# Supplementary material for: Amphiphilic fluorescent carbon nanodots as a selective nanoprobe for nitrite and tetracycline both in aqueous and organic solutions
Source: Royal Society of Chemistry journal article supplement (doi:10.1039/d0nj00435a), 2020-01-01
Supplement: d0nj00435a1.pdf [file d0nj00435a1.pdf]

## Supplementary Information

### **Amphiphilic fluorescent carbon nanodots as a selective nanoprobe for nitrite and tetracycline both in aqueous and organic solution**

**Khalid M. Omer,<sup>1,\*</sup> Shinwar A. Idress,<sup>2</sup> Aso Q. Hassan,<sup>1</sup> Lazgin A. Jamil<sup>2\*</sup>**

<sup>1</sup> Department of Chemistry, University of Sulaimani, Qlisan St, 46002, Kurdistan region, Iraq

<sup>2</sup> Department of Chemistry, University of Zakho, Kurdistan region, Iraq

Corresponding author, Email: [khalid.omer@univsul.edu.iq](mailto:khalid.omer@univsul.edu.iq)

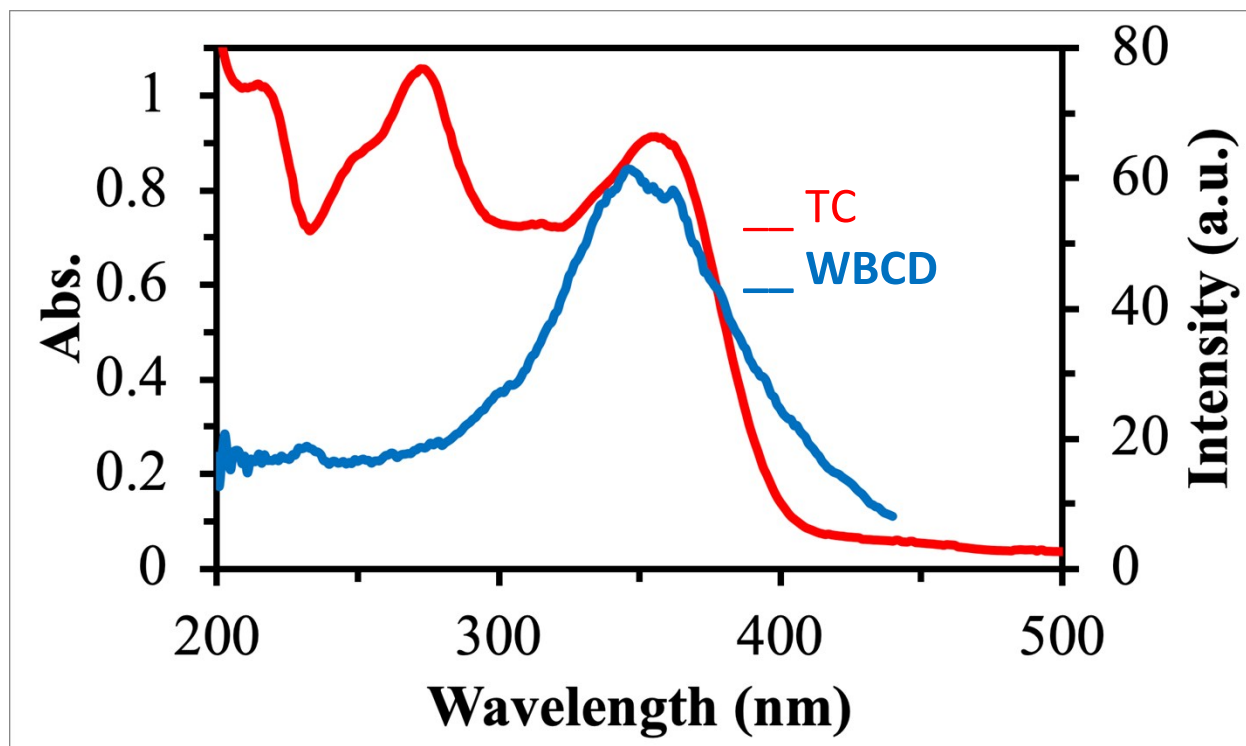

Figure S1. Absorption spectra of TC (red line) and excitation spectrum of WBCD (emission line is 450 nm). The solvent is Chloroform.
